# Supplementary material
Source: publisher figshare collection journal article supplement (https://geolsoc.figshare.com/ndownloader/files/13854308)
Supplement: Supplementary file 1 [file 13854308]

| Loc. no. | Latitude (°N) | Longitude (°E) |
| --- | --- | --- |
| 1 | 30.8136 | 78.6205 |
| 2 | 30.7725 | 78.5997 |
| 3 | 30.76 | 78.5811 |
| 4 | 30.7544 | 78.5593 |
| 5 | 30.732517 | 78.432383 |
| 6 | 30.7432 | 78.3586 |
| 7 | 30.7224 | 78.3603 |
| 8 | 30.6802 | 78.3497 |
| 9 | 30.659917 | 78.336383 |
| 10 | 30.651667 | 78.332222 |
| 11 | 30.618883 | 78.326517 |
| 12 | 30.597 | 78.3191 |
| 13 | 30.5495 | 78.3238 |
| 14 | 30.531917 | 78.321317 |
| 15 | 30.5243 | 78.310467 |
| 16 | 30.525 | 78.2986 |
| 17 | 30.5181 | 78.288 |
| 18 | 30.522 | 78.2727 |
| 19 | 30.505933 | 78.271267 |
| 20 | 30.493183 | 78.25265 |
| 21 | 30.4802 | 78.234833 |
| 22 | 30.465 | 78.234667 |
| 23 | 30.4769 | 78.20015 |
| 24 | 30.477333 | 78.17885 |
| 25 | 30.4297 | 78.2362 |
| 26 | 30.4435 | 78.2053 |
| 27 | 30.4451 | 78.195 |
| 28 | 30.4453 | 78.1756 |
| 29 | 30.4459 | 78.1619 |
| 30 | 30.451967 | 78.14645 |
| 31 | 30.4518 | 78.13075 |

**Table S2.** GPS coordinates of the field locations.
